# Supplementary material for: Identification of circulating tumor cells captured by the FDA-cleared Parsortix® PC1 system from the peripheral blood of metastatic breast cancer patients using immunofluorescence and cytopathological evaluations
Source: PubMed Central journal article supplement (PMC11337573; doi:10.1186/s13046-024-03149-x), 2024-08-21

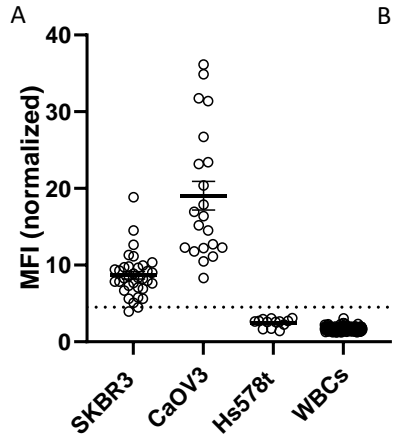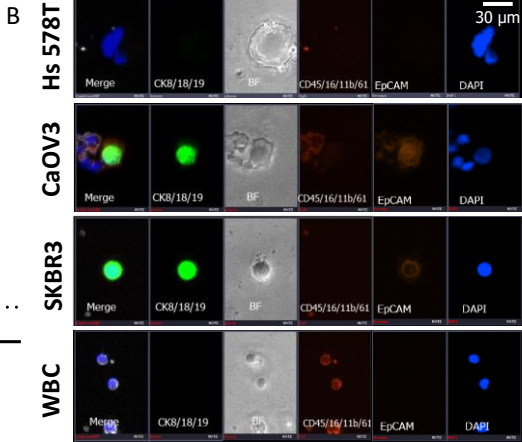

Supplement: 13046_2024_3149_MOESM2_ESM.pdf [file 13046_2024_3149_MOESM2_ESM.pdf]
