# Supplementary material for: Identification of circulating tumor cells captured by the FDA-cleared Parsortix® PC1 system from the peripheral blood of metastatic breast cancer patients using immunofluorescence and cytopathological evaluations
Source: PubMed Central journal article supplement (PMC11337573; doi:10.1186/s13046-024-03149-x), 2024-08-21

**A**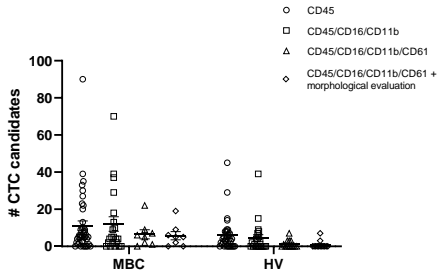**B**

|              | CD Markers used: |                 |                      |                                   |
|--------------|------------------|-----------------|----------------------|-----------------------------------|
| % Positivity | CD45 only        | CD45/CD16/CD11b | CD45/CD16/CD11b/CD61 | CD45/CD16/CD11b/CD61 + morphology |
| MBC          | 83%              | 76%             | 87%                  | 75%                               |
| HV           | 70%              | 50%             | 38%                  | 15%                               |

**C**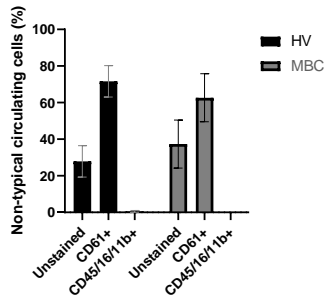**D**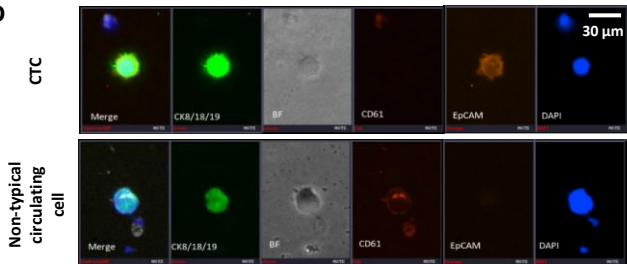

Supplement: 13046_2024_3149_MOESM4_ESM.pdf [file 13046_2024_3149_MOESM4_ESM.pdf]
