# Supplementary material for: Identification of circulating tumor cells captured by the FDA-cleared Parsortix® PC1 system from the peripheral blood of metastatic breast cancer patients using immunofluorescence and cytopathological evaluations
Source: PubMed Central journal article supplement (PMC11337573; doi:10.1186/s13046-024-03149-x), 2024-08-21
Supplement: 13046_2024_3149_MOESM5_ESM.pdf [file 13046_2024_3149_MOESM5_ESM.pdf]

A

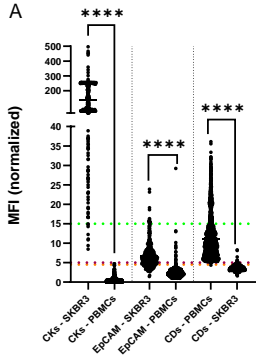

B

|              | CKs+            | EpCAM+          | CDs+               |
|--------------|-----------------|-----------------|--------------------|
| <b>SKBR3</b> | 407/413:<br>99% | 336/413:<br>81% | 2580/2580:<br>100% |
| <b>WBCs</b>  | 0/2580:<br>0%   | 15/2580:<br>6%  | 10/630:<br>2%      |
